# Supplementary material
Source: PubMed Central journal article supplement (PMC2867765)
Supplement: 0912943107_pnas.200912943SI.pdf [file 0912943107_pnas.200912943SI.pdf]

# Supporting Information

Jiang et al. 10.1073/pnas.0912943107

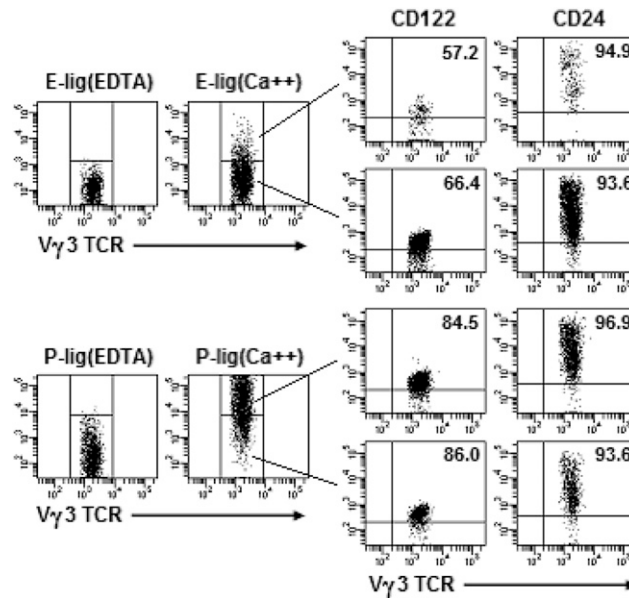

**Fig. S1.** Thymic dendritic epidermal T cell (DETC) precursors in normal WT C57BL/6 mice express CD122 and CD24. Fetal thymocyte suspensions of WT mice at embryonic day (ED) 15 were prepared. CD3+ Vγ3 T-cell receptor (TCR)-positive DETC precursors were gated for analysis of E selectin ligand (E-lig) or P selectin ligand (P-lig) expression. CD122 and CD24 expression on E-lig/P-lig+ or E-lig/P-lig- DETC precursors were examined further. The numbers in quadrants indicate the percentages in E-lig/P-lig+ or E-lig/P-lig- DETC precursors.

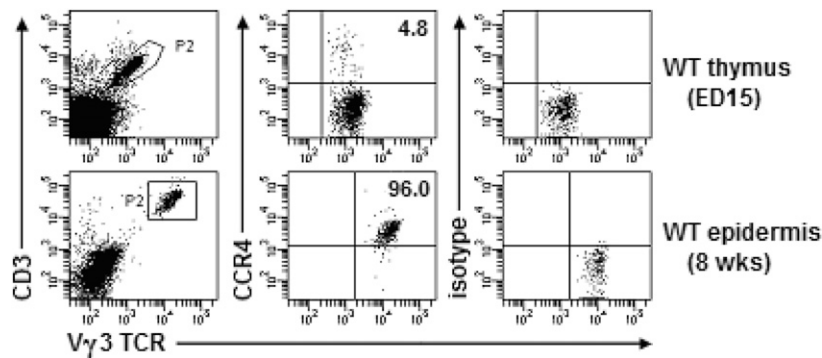

**Fig. S2.** DETC in normal WT C57BL/6 mice express CCR4. Fetal thymocytes at ED 15 or epidermal cells of 8-week-old WT mice were incubated with mCCL22/Fc chimera, followed by staining with anti-hFc-IgG and other cell-surface markers. The numbers in quadrants indicate the percentages in DETC or DETC precursors. Results are representative of four independent experiments.

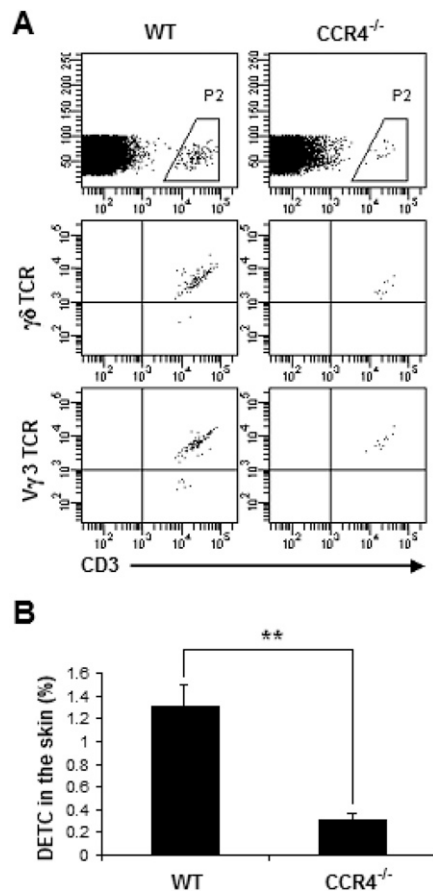

**Fig. S3.** DETC in newborn skin are diminished in CCR4<sup>-/-</sup> mice. (A) Total newborn skin cells were prepared from WT or CCR4<sup>-/-</sup> mice. Cells then were washed thoroughly and labeled with fluorescence-conjugated anti-CD3, anti- $\gamma\delta$  TCR, and anti-V $\gamma$ 3 TCR mAbs for DETC analysis by flow cytometry. (B) Summary data on the percentages ( $\times 1,000$ ) of DETC in gated skin cells. \*\*,  $P < 0.01$ . One of six independent experiments with similar results is shown.
